# Supplementary material
Source: PubMed Central journal article supplement (PMC1785091)
Supplement: blood_blood-2006-05-024752_1.pdf [file blood_blood-2006-05-024752_1.pdf]

|                                | <i>Rce1<sup>fl/fl</sup></i> |           | <i>Rce1<sup>fl/+</sup></i> |           | <i>P</i> value |
|--------------------------------|-----------------------------|-----------|----------------------------|-----------|----------------|
|                                | - pl-pC                     | + pl-pC   | - pl-pC                    | + pl-pC   |                |
| <b>Mature cells (%)</b>        | <b>97</b>                   | <b>42</b> | <b>97</b>                  | <b>89</b> | -              |
| Granulocytes                   | 14 ± 1.5                    | 16 ± 2.0  | 22 ± 4.4                   | 33 ± 4.7  | 0.009          |
| Monocytes                      | 4 ± 0.6                     | 3 ± 0.6   | 3 ± 0.6                    | 5 ± 0.7   | 0.04           |
| Lymphocytes                    | 79 ± 1.5                    | 23 ± 2.7  | 71 ± 4.7                   | 51 ± 4.3  | 0.0002         |
| <b>Immature cells (%)</b>      | <b>3</b>                    | <b>58</b> | <b>3</b>                   | <b>11</b> | -              |
| Blast cells                    | 0                           | 2 ± 0.5   | 0                          | 0         | 0.02           |
| Immature myelo/monocytic cells | 0                           | 17 ± 3.2  | 0                          | 2 ± 0.8   | 0.001          |
| Band cells                     | 2 ± 0.6                     | 16 ± 2.2  | 2 ± 0.5                    | 5 ± 0.6   | 0.001          |
| Pelgeroid cells                | 1 ± 0.3                     | 24 ± 3.8  | 1 ± 0.4                    | 3 ± 1.4   | 0.001          |
