# Supplementary material
Source: PubMed Central journal article supplement (PMC1785091)

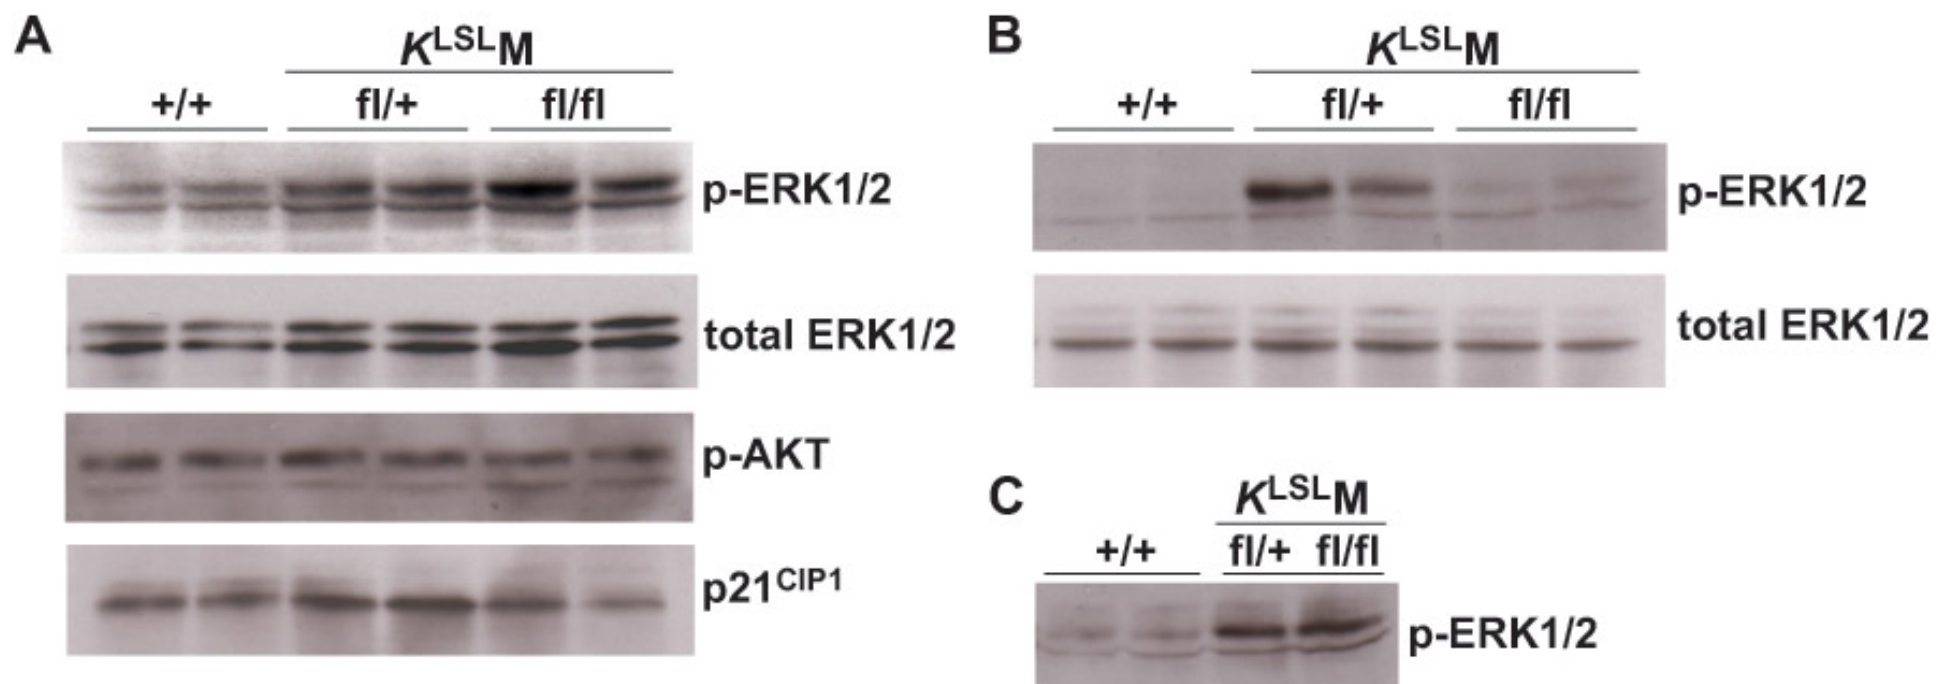

Supplement: blood_blood-2006-05-024752_2.pdf [file blood_blood-2006-05-024752_2.pdf]
